# Supplementary material for: Enhanced water oxidation reaction kinetics on a BiVO4 photoanode by surface modification with Ni4O4 cubane
Source: Royal Society of Chemistry journal article supplement (doi:10.1039/c8ta09404g), 2018-11-20
Supplement: c8ta09404g1.pdf [file c8ta09404g1.pdf]

**Enhanced water oxidation reaction kinetics on BiVO<sub>4</sub>  
photoanode by the surface modification with Ni<sub>4</sub>O<sub>4</sub> cubane**

Bin Gao<sup>a</sup>, Tao Wang<sup>a,\*</sup>, Xiaoli Fan<sup>a</sup>, Hao Gong<sup>a</sup>, Peng Li<sup>a</sup>, Yaya Feng<sup>a</sup>,  
Xianli Huang<sup>a</sup>, Jianping He<sup>a,\*</sup>, Jinhua Ye<sup>b,\*</sup>

<sup>a</sup> College of Materials Science and Technology, Jiangsu Key Laboratory of Electrochemical Energy Storage Technologies, Nanjing University of Aeronautics and Astronautics, Nanjing 210016, PR China.

<sup>b</sup> International Center for Materials Nanoarchitectonics (WPI-MANA), National Institute for Materials Science (NIMS), 1-1 Namiki, Tsukuba, Ibaraki 305-0044 (Japan)

\*Corresponding authors:

Prof. Tao Wang, Tel: +86 25 52112900; Fax: +86 25 52112626, E-mail:  
wangtao0729@nuaa.edu.cn;

Prof. Jianping He, Tel: +86 25 52112900; Fax: +86 25 52112626, E-mail:  
jianph@nuaa.edu.cn;

Prof. Jinhua Ye, Tel: +81 29 8592646; Fax: +81 29 8604958, E-mail:

Jinhua.YE@nims.go.jp.

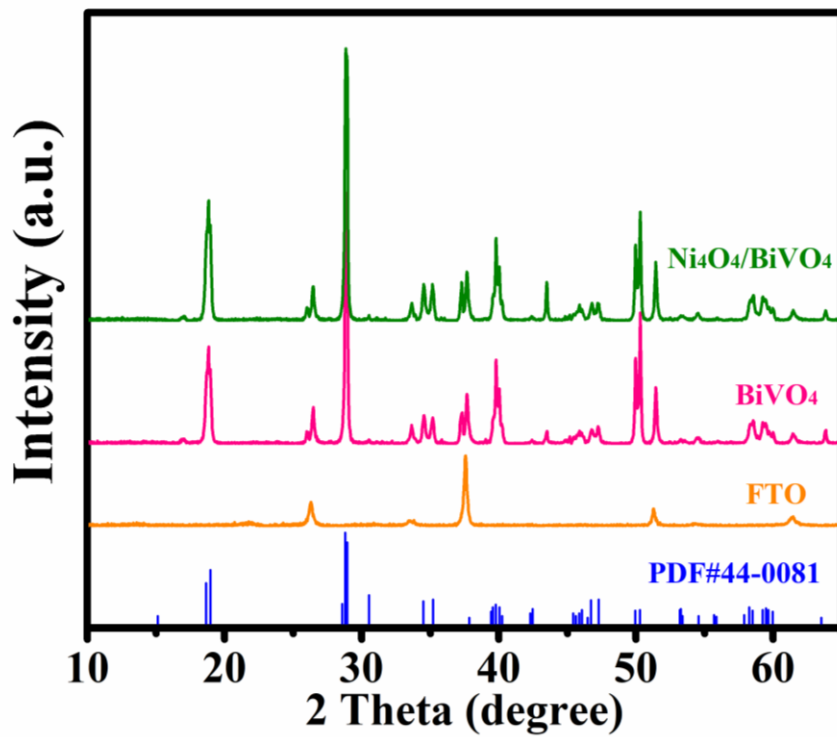

Fig. S1. XRD of Ni<sub>4</sub>O<sub>4</sub>/BiVO<sub>4</sub> and BiVO<sub>4</sub> photoanodes.

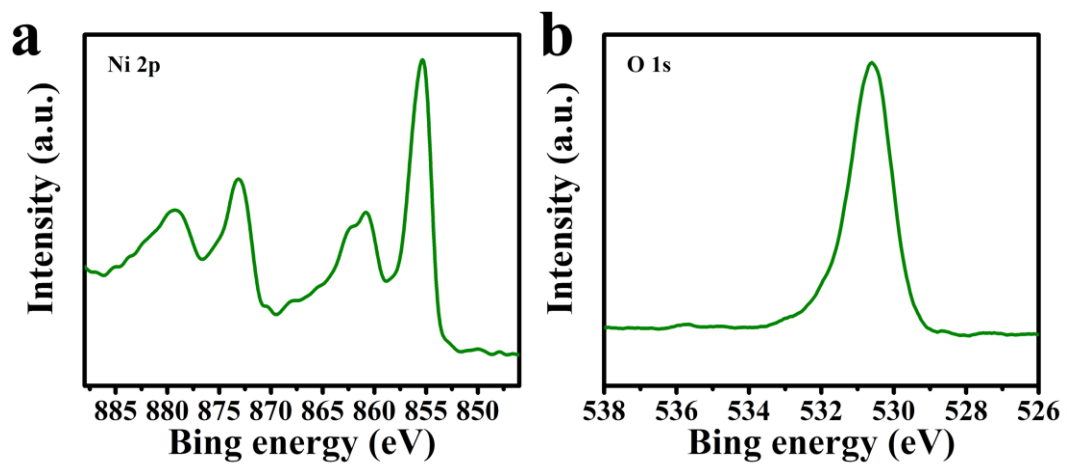

Fig. S2. High-resolution spectrum of Ni 2p (a) and O 1s (b) of  $\text{Ni(OH)}_2$ .

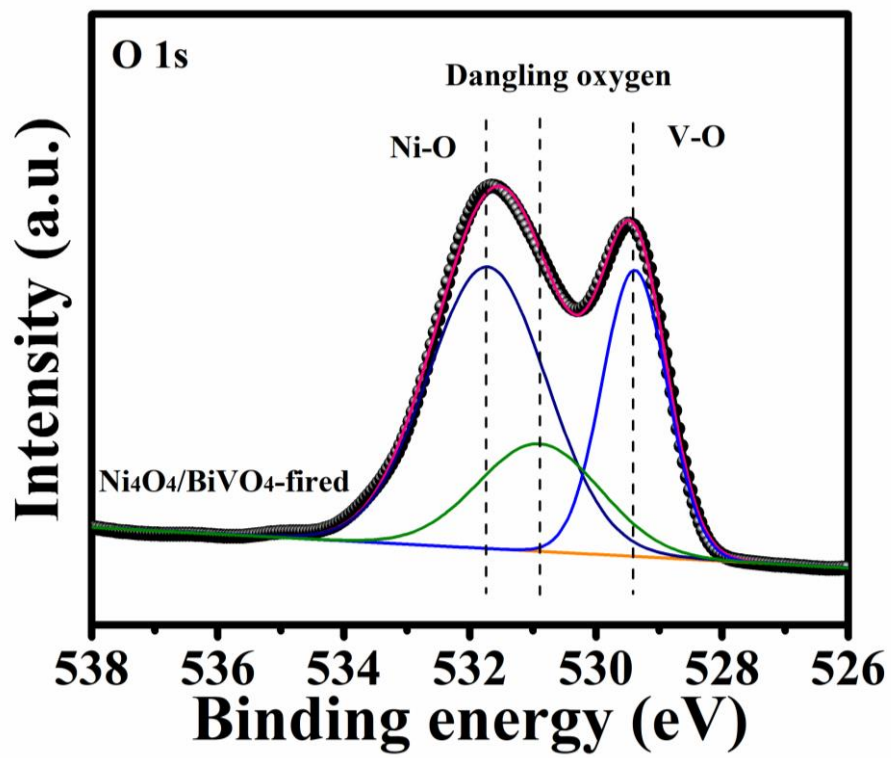

Fig. S3. High-resolution spectrum of O 1s of Ni<sub>4</sub>O<sub>4</sub>/BiVO<sub>4</sub> photoanode after fired.

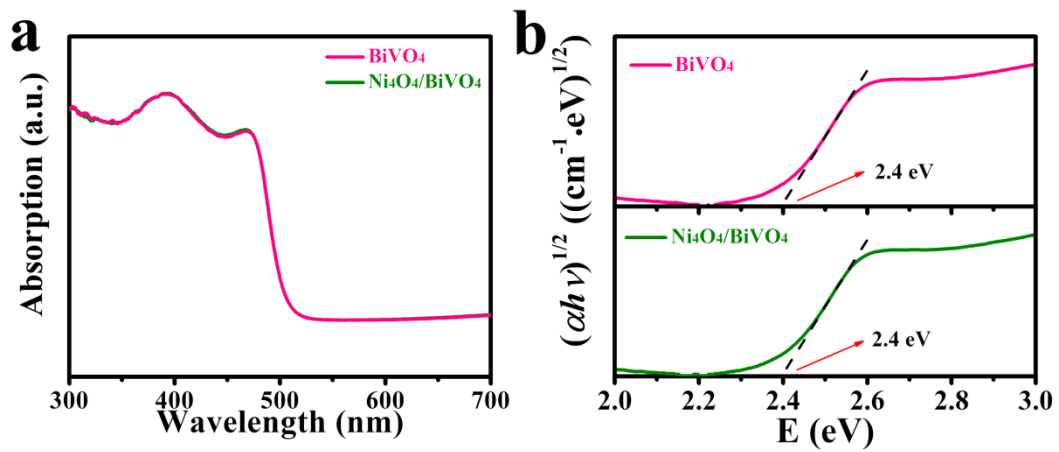

Fig. S4. UV-vis spectra (a) and tauc plots (b) of BiVO<sub>4</sub> and Ni<sub>4</sub>O<sub>4</sub>/BiVO<sub>4</sub>.

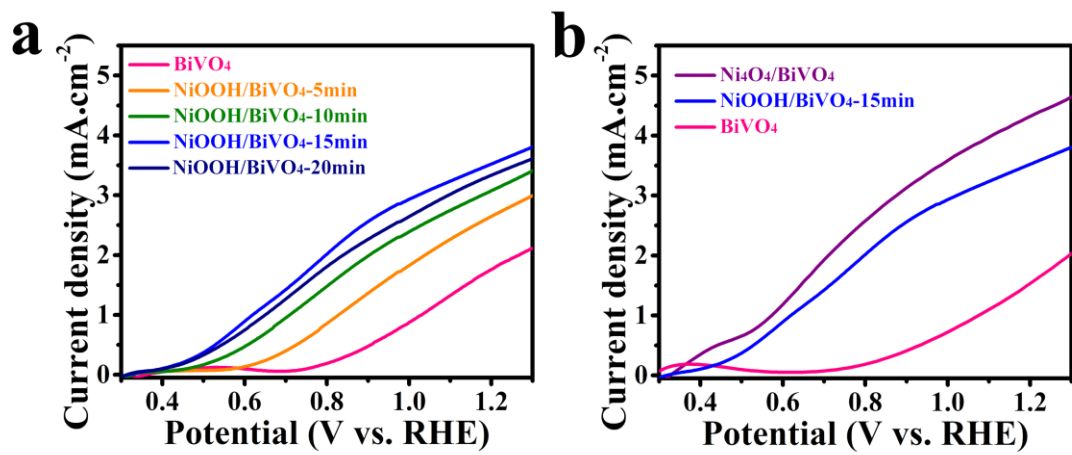

Fig. S5. (a) LSV of NiOOH modified BiVO<sub>4</sub> photoanodes with different deposition time; (b) LSV of Ni<sub>4</sub>O<sub>4</sub>/BiVO<sub>4</sub> and NiOOH/BiVO<sub>4</sub>. Depositional condition: three-electrode system, 0.1 M NiSO<sub>4</sub> solution with pH adjusted to 7 by NaOH and a bias voltage of 1 V (vs. SCE)

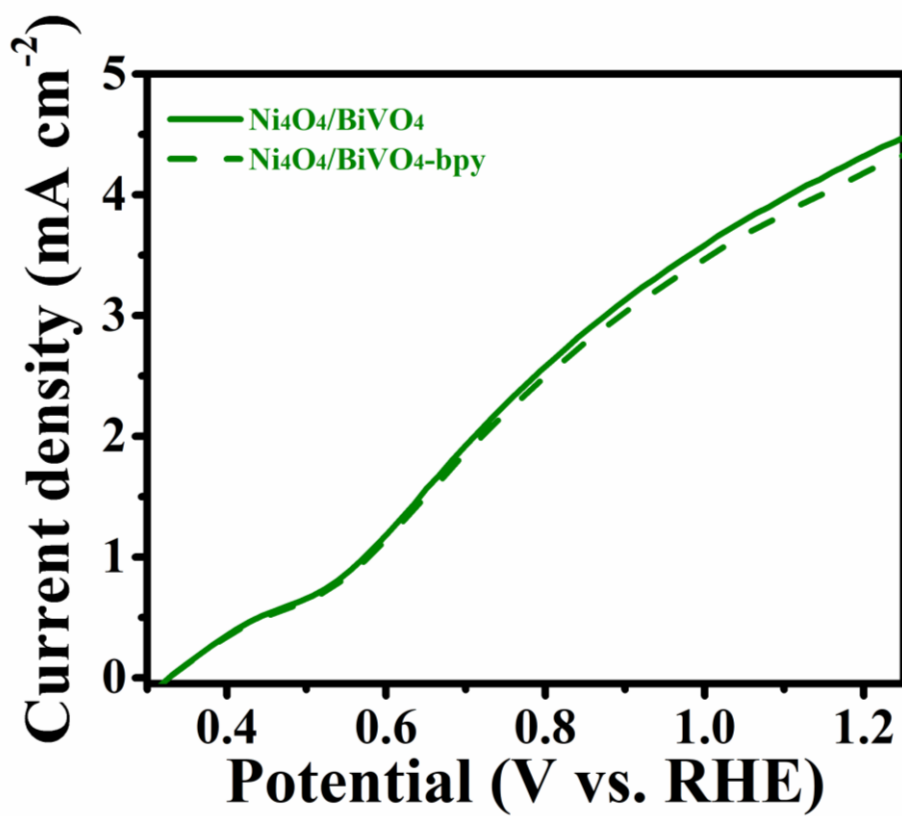

Fig. S6. LSV curves of Ni<sub>4</sub>O<sub>4</sub>/BiVO<sub>4</sub> in phosphate buffer electrolyte (pH=7) with 80  $\mu$ M bpy and without bpy.

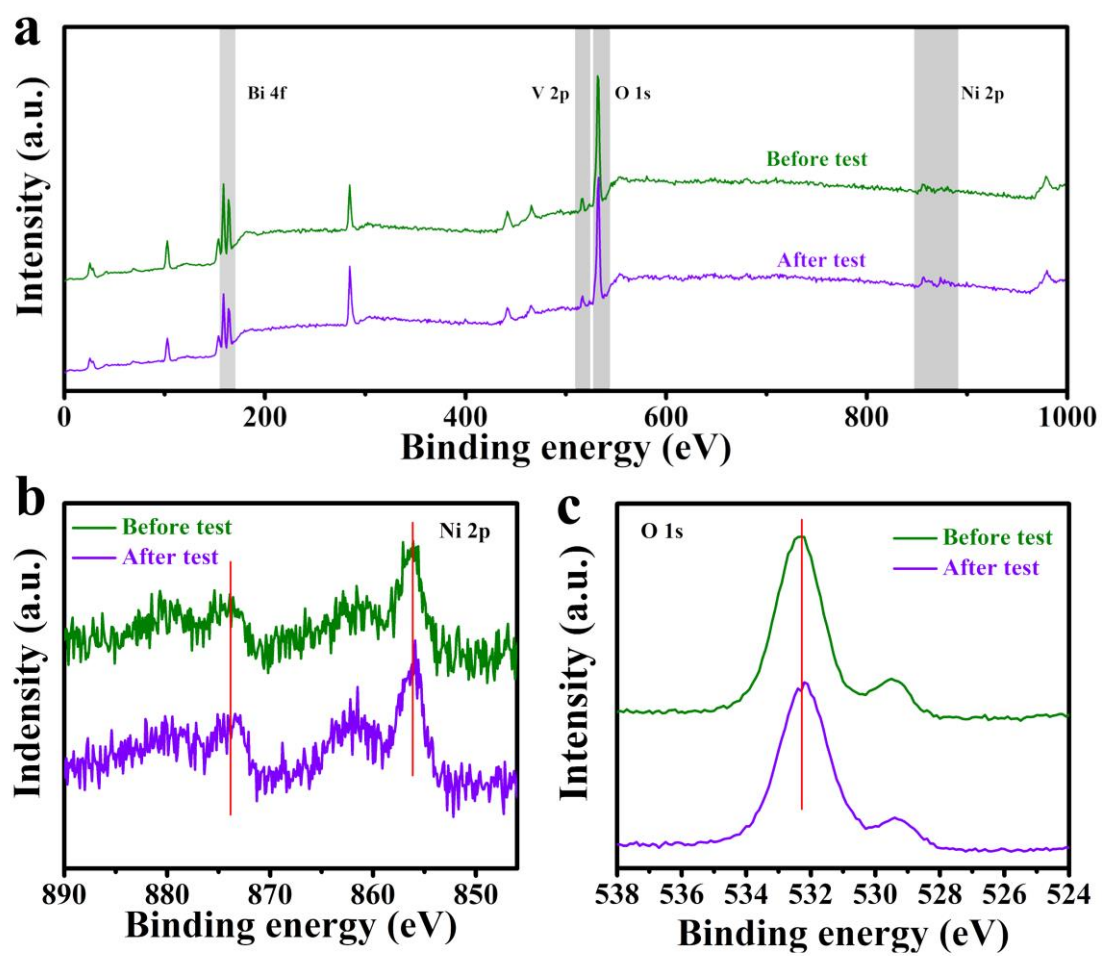

Fig. S7. XPS survey spectrum (a) and high-resolution spectra of Ni 2p (b), O 1s (c) of  $\text{Ni}_4\text{O}_4/\text{BiVO}_4$  before and after testing.



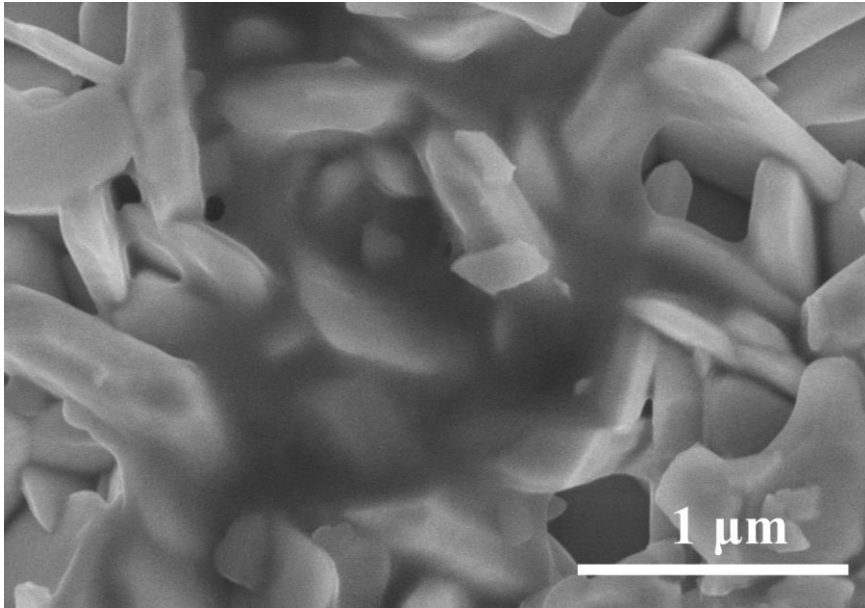

Fig. S8. The SEM image of Ni<sub>4</sub>O<sub>4</sub>/BiVO<sub>4</sub> photoanode after tested.

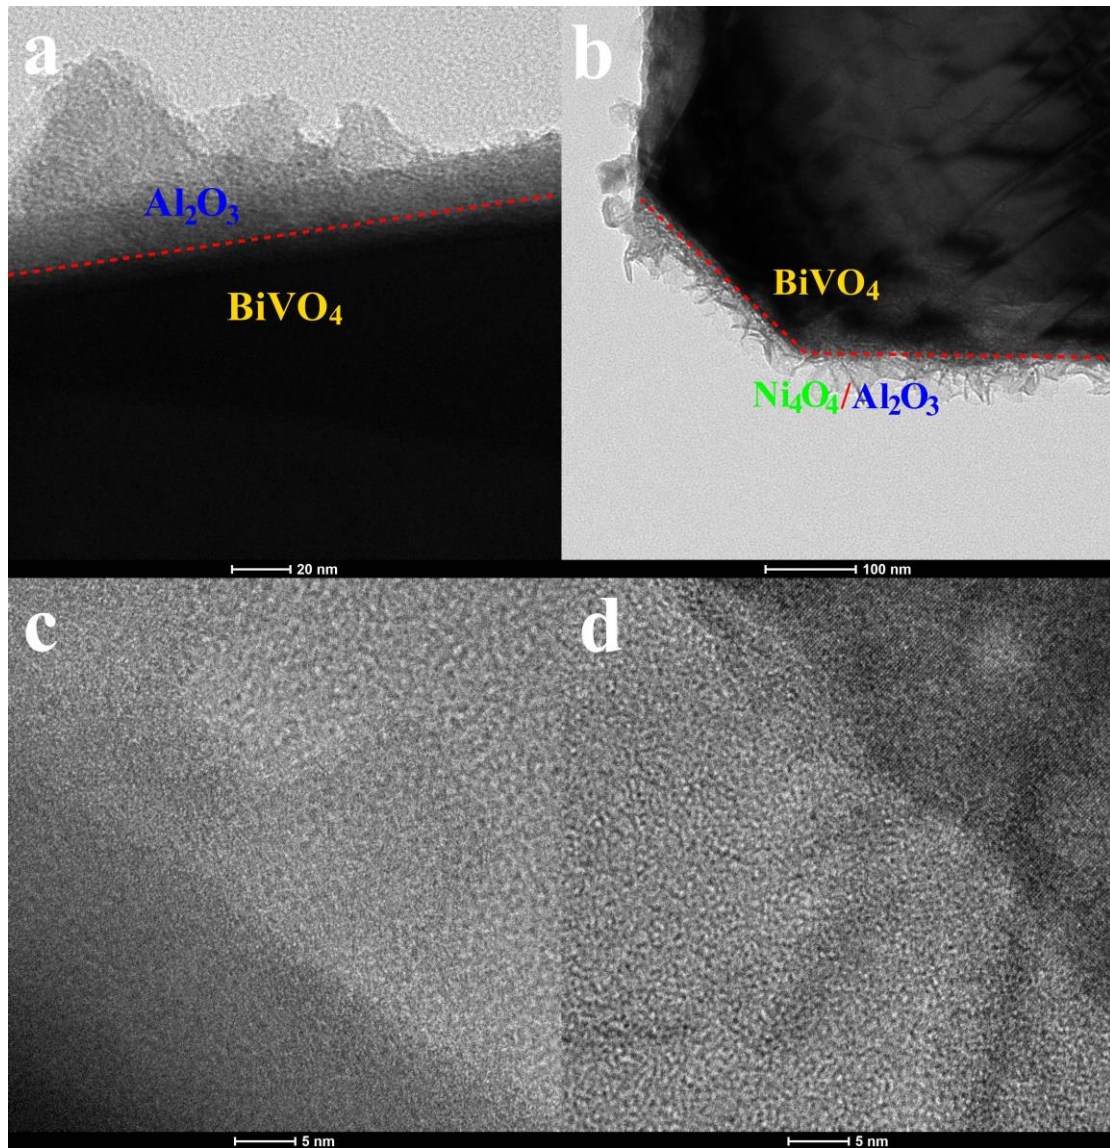

Fig. S9. The TEM and HRTEM images of  $\text{Al}_2\text{O}_3/\text{BiVO}_4$  (a, c) and  $\text{Ni}_4\text{O}_4/\text{Al}_2\text{O}_3/\text{BiVO}_4$  (b, d) nanoplating.

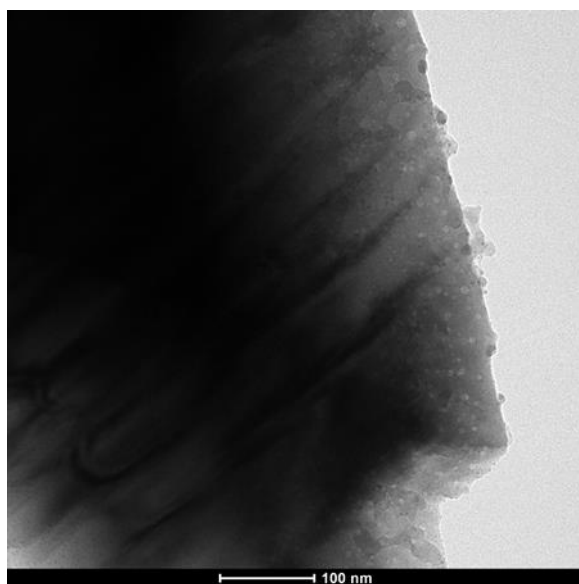

Fig. S10. The TEM image of BiVO<sub>4</sub> crystal.

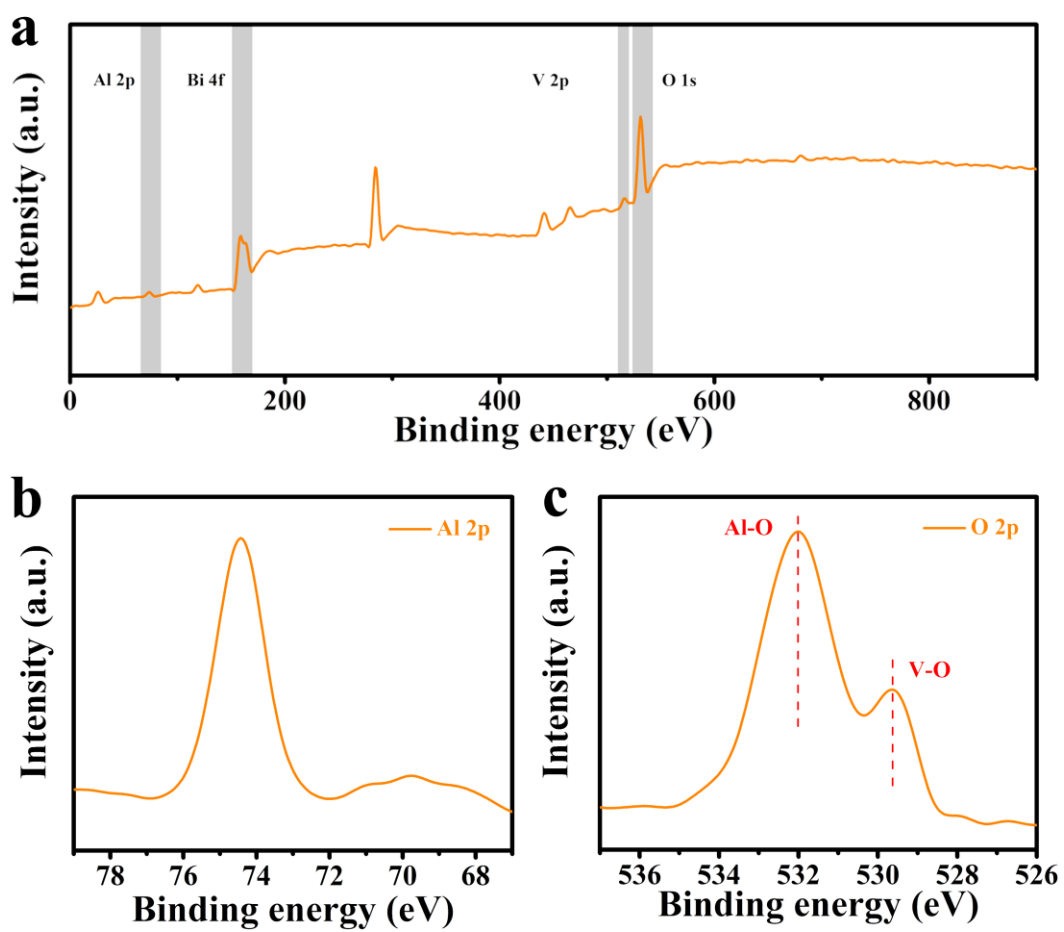

Fig. S11. XPS survey spectrum (a) and high resolution Al 2p (b) and O 2p (c) XPS spectra of  $\text{Al}_2\text{O}_3/\text{BiVO}_4$  photoanode.

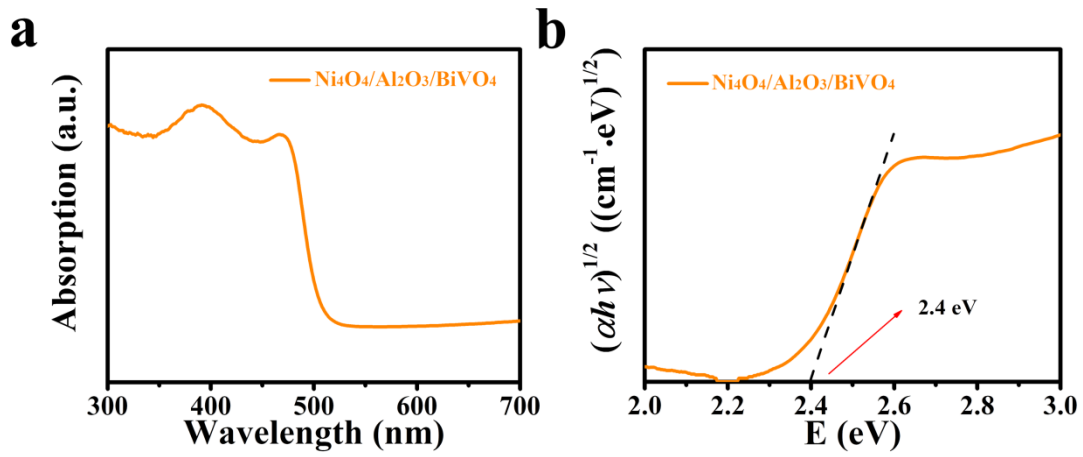

Fig. S12. UV-vis spectra (a) and tauc plots (b) of  $\text{Al}_2\text{O}_3/\text{BiVO}_4$ .

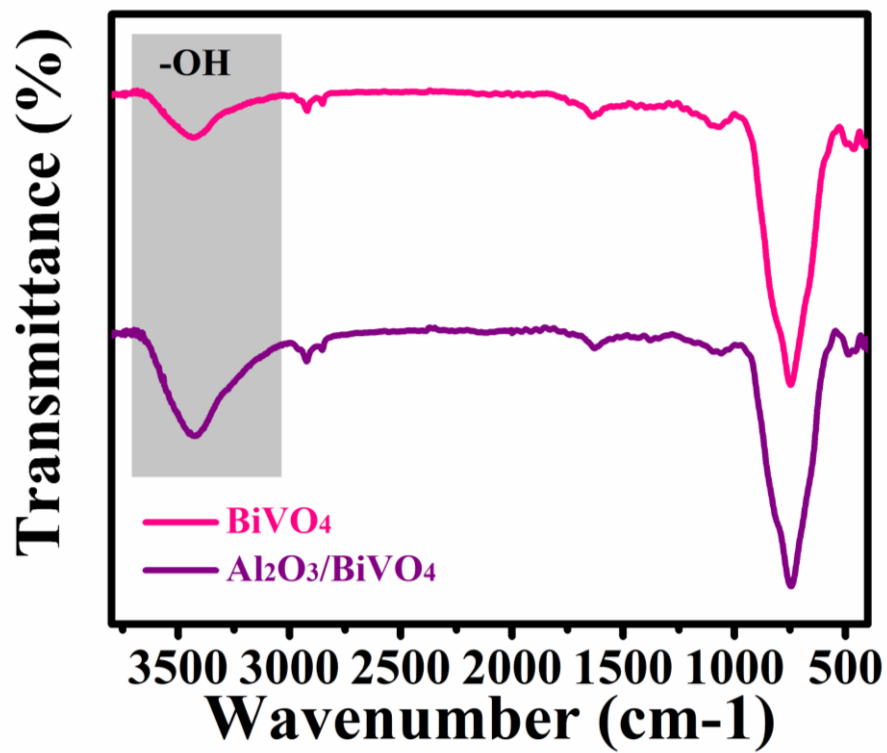

Fig. S13. FTIR of BiVO<sub>4</sub> and Al<sub>2</sub>O<sub>3</sub>/BiVO<sub>4</sub>.

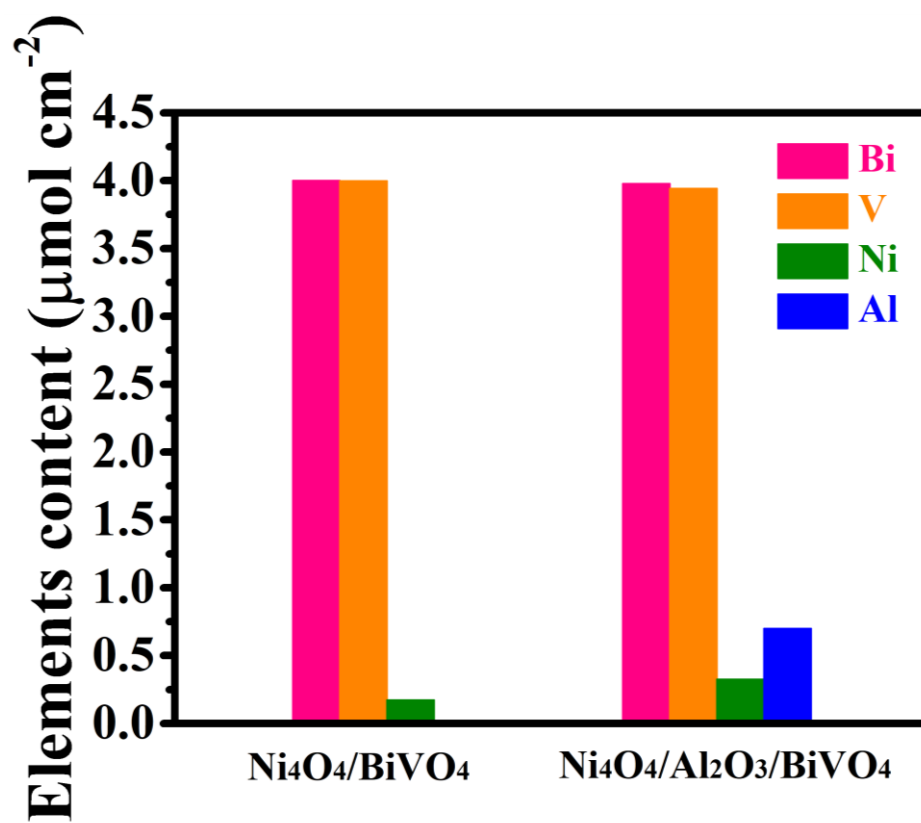

Fig. S14. ICP of  $\text{Ni}_4\text{O}_4/\text{BiVO}_4$  and  $\text{Ni}_4\text{O}_4/\text{Al}_2\text{O}_3/\text{BiVO}_4$ .

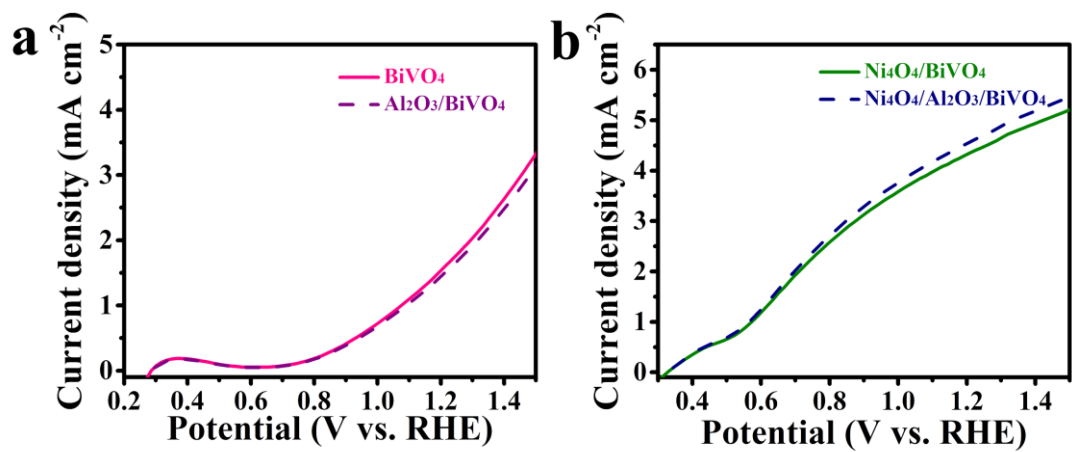

Fig. S15. The LSV curves of BiVO<sub>4</sub> and Al<sub>2</sub>O<sub>3</sub>/BiVO<sub>4</sub> (a) and Ni<sub>4</sub>O<sub>4</sub>/BiVO<sub>4</sub> and Ni<sub>4</sub>O<sub>4</sub>/Al<sub>2</sub>O<sub>3</sub>/BiVO<sub>4</sub> (b).



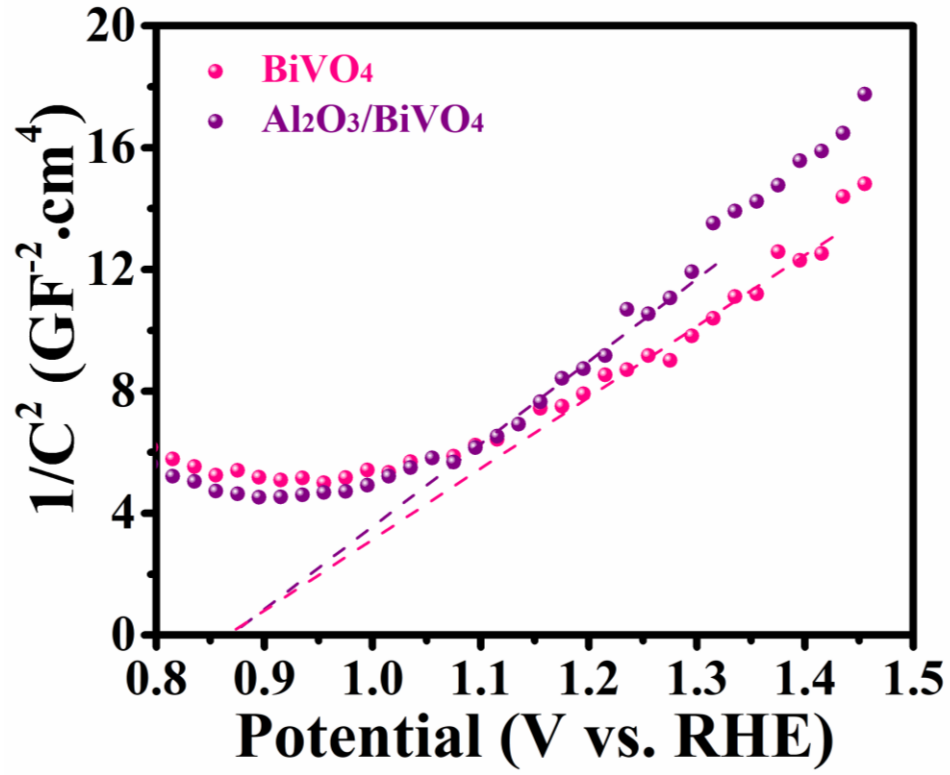

Fig. S16. Mott-schottky plots of  $\text{BiVO}_4$  and  $\text{Al}_2\text{O}_3/\text{BiVO}_4$  photoanode.

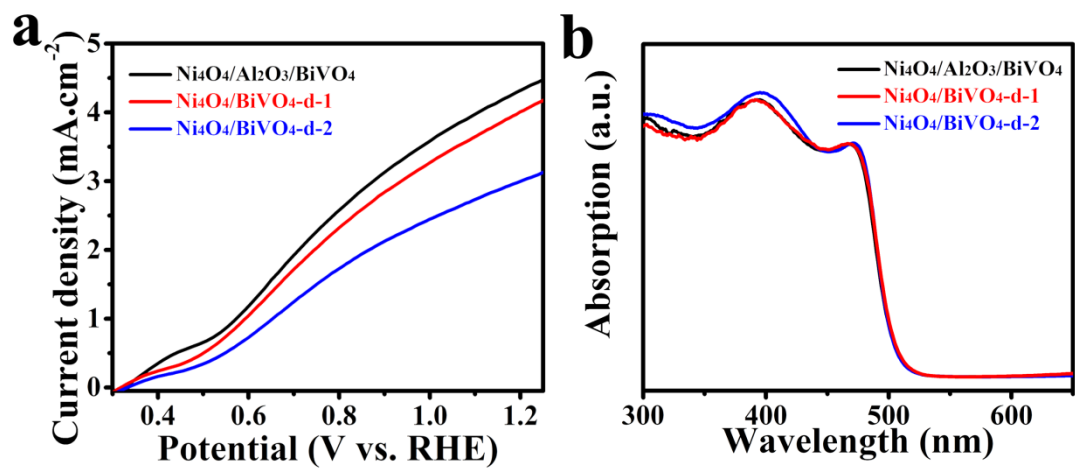

Fig. S17. (a) LSV and (b) UV-vis spectra of Ni<sub>4</sub>O<sub>4</sub>/Al<sub>2</sub>O<sub>3</sub>/BiVO<sub>4</sub>, Ni<sub>4</sub>O<sub>4</sub>/BiVO<sub>4</sub>-d-1 and Ni<sub>4</sub>O<sub>4</sub>/BiVO<sub>4</sub>-d-2.

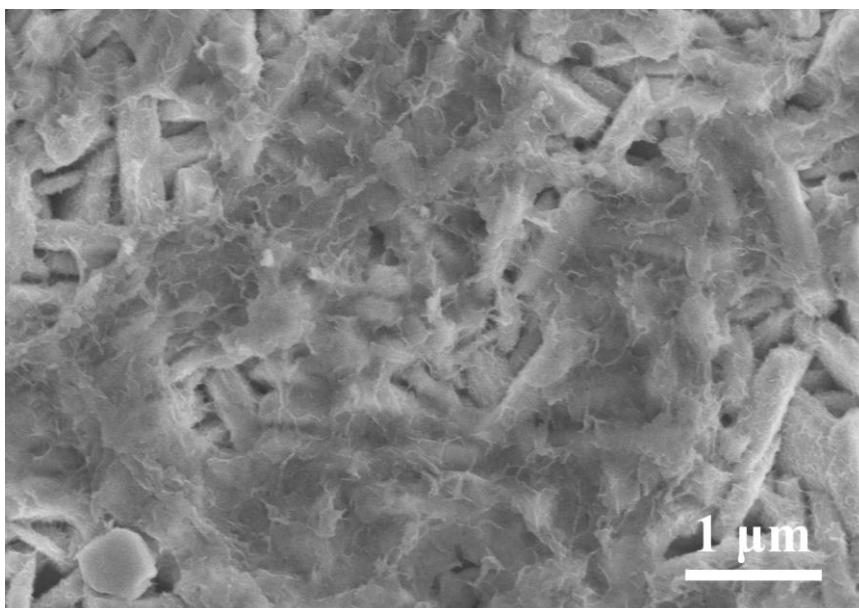

Fig. S18. The SEM image of Ni<sub>4</sub>O<sub>4</sub>/Al<sub>2</sub>O<sub>3</sub>/BiVO<sub>4</sub> photoanode after tested.

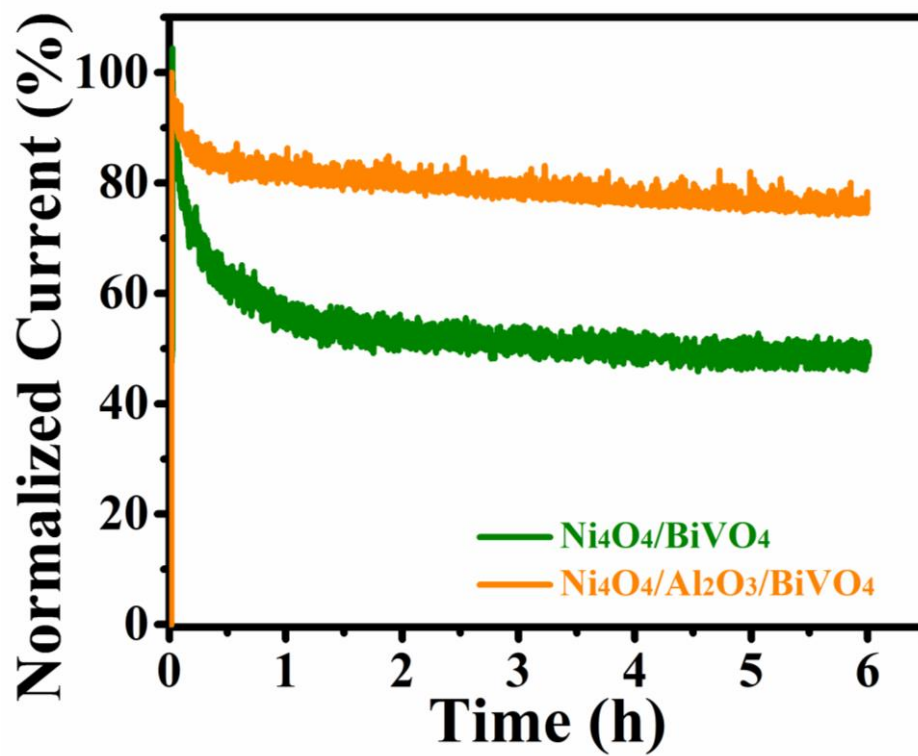

Fig. S19. I-t curve of Ni<sub>4</sub>O<sub>4</sub>/BiVO<sub>4</sub> and Ni<sub>4</sub>O<sub>4</sub>/Al<sub>2</sub>O<sub>3</sub>/BiVO<sub>4</sub> photoanodes for 6 h.

**Table S1.** Summary of the water oxidation properties of high performing OER catalysts for BiVO<sub>4</sub> based photoanodes.

| Photoanode                                        | Light source                   | Electrolyte                              | Onset potential with cocatalyst (V) | Onset potential without cocatalyst (V) | Photocurrent density with cocatalyst (mA/cm <sup>2</sup> , 1.23 VRHE) | Photocurrent density without cocatalyst (mA/cm <sup>2</sup> , 1.23 VRHE) | Ref.      |
|---------------------------------------------------|--------------------------------|------------------------------------------|-------------------------------------|----------------------------------------|-----------------------------------------------------------------------|--------------------------------------------------------------------------|-----------|
| Ni <sub>4</sub> O <sub>4</sub> /BiVO <sub>4</sub> | AM<br>1.5G                     | 0.5 M KPi*<br>(pH=7)                     | 0.35                                | 0.7                                    | 3.9                                                                   | 1.5                                                                      | This work |
| FeOOH/NiOOH<br>/BiVO <sub>4</sub>                 | AM<br>1.5G                     | 0.5 M KPi<br>(pH=7)                      | 0.23                                | 0.43                                   | 4.2                                                                   | 1.8                                                                      | 1         |
| NiO/CoO <sub>x</sub> /BiVO <sub>4</sub>           | AM<br>1.5G                     | 0.1 M KPi<br>(pH=7)                      | 0.35                                | 0.55†                                  | 3.5                                                                   | 1.05†                                                                    | 2         |
| CoFe-H/BiVO <sub>4</sub>                          | AM<br>1.5G                     | 0.5 M KPi<br>(pH=7)                      | 0.23                                | 0.68                                   | 2.48                                                                  | 0.78                                                                     | 3         |
| β-FeOOH/BiVO <sub>4</sub>                         | AM<br>1.5G                     | 0.2 M<br>Na <sub>2</sub> SO <sub>4</sub> | 0.45†                               | 0.65†                                  | 4.3                                                                   | 1.45†                                                                    | 4         |
| NiB/BiVO <sub>4</sub>                             | AM<br>1.5G                     | 0.5 M KB**<br>(pH=9.2)                   | 0.25                                | 0.35                                   | 3.47                                                                  | 1.56                                                                     | 5         |
| Co <sub>3</sub> O <sub>4</sub> /BiVO <sub>4</sub> | AM<br>1.5G                     | 1 M KB<br>(pH=9.5)                       | 0.55                                | Unconspicuous                          | 2.71                                                                  | 0.71                                                                     | 6         |
| CoPi/BiVO <sub>4</sub>                            | 365 nm<br>LEDs<br>(AM<br>1.5G) | 0.1 M KPi<br>(pH=6.7)                    | 0.5                                 | 0.9                                    | 2                                                                     | 0.9                                                                      | 7         |

\* KPi: Potassium phosphate buffer

\*\* KB: Potassium borate buffer

† Estimated from figures in reference, unless denoted otherwise

Tab. S2. Calculated and measured gas evolution rates obtained from Fig. 8 (data during the first hour).

|             | O <sub>2</sub> evolution rate (μmol h <sup>-1</sup> ) | Photocurrent density (mA cm <sup>-2</sup> ) | Faradaic efficiency (%) |
|-------------|-------------------------------------------------------|---------------------------------------------|-------------------------|
| Actual      | 31.2                                                  | 3.34                                        | 96.3                    |
| Theoretical | 32.4                                                  | 3.47                                        | 100                     |

#### References

- [1] T. W. Kim, K. S. Choi, *Science*, 2014, **45**, 990-994.
- [2] M. Zhong, T. Hisatomi, Y. Kuang, J. Zhao, M. Liu, A. Lwase, Q. Jia, H. Nishiyama, T. Minegishi, M. Nakabayashi, N. Shibata, R. Nishiro, C. Katayama, H. Shibano, M. Katayama, A. Kudo, T. Yamada, K. Domen, *J. Am. Chem. Soc.*, 2015, **137**, 5053-5060.
- [3] W. Liu, H. Liu, L. Dang, H. Zhang, X. Wu, B. Yang, Z. Li, X. Zhang, L. Lei, S. Jin, *Adv. Funct. Mater.*, 2017, **27**, 1603904.
- [4] B. Zhang, L. Wang, Y. Zhang, Y. Ding, Y. Bi, *Angew. Chem. Int. Edit.*, 2018, **57**, 2248-2252.
- [5] K. Dang, X. Chang, T. Wang, J. Gong, *Nanoscale*, 2017, **9**, 16133-16137.
- [6] X. Chang, T. Wang, P. Zhang, J. Zhang, A. Li, J. Gong, *J. Am. Chem. Soc.*, 2015, **137**, 8356-8359.
- [7] Y. Ma, A. Kafizas, S. R. Pendlebury, F. L. Forman, J. R. Durrant, *Adv. Funct. Mater.*, 2016, **26**, 4951-4960.
